# Supplementary material for: Climate change could drive marine food web collapse through altered trophic flows and cyanobacterial proliferation
Source: PLoS Biol. 2018 Jan 9;16(1):e2003446. doi: 10.1371/journal.pbio.2003446 (PMC5760012; doi:10.1371/journal.pbio.2003446)
Supplement: S2 Table — Significant differences are indicated with asterisks, with *: p < 0.05, **: p < 0.01, and ***: p < 0.001. OA, elevated CO2; T, elevated temperature. (XLSX) [file pbio.2003446.s011.xlsx]

## Sheet: Table legend
S2_Table. Analysis of variance of the effects of ocean acidification (OA) and warming (T) and their interaction on living biomass by trophic levels of the food web. Significant differences are indicated with asterisks, with *: p < 0.05, **: p < 0.01 and ***: p < 0.001.

## Sheet: Table
Response variable [transformation]	Source of variation	df	MS	F	P
a) Living biomass (log10) (Trophic level 1)	OA	1	0.117	10.62	0.012**
	T	1	0.161	15.33	0.004**
	OA × T	1	0.068	6.46	0.035*
	Residuals	8	0.011
b) Living biomass (log10) (Trophic level 2)	OA	1	0.003	0.254	0.627
	T	1	0.569	44.91	0.000 ***
	OA × T	1	0.061	4.84	0.059
	Residuals	8	0.013
c) Living biomass (log10) (Trophic level 3)	OA	1	0.002	0.36	0.564
	T	1	0.552	94.87	0.000***
	OA × T	1	0.058	10.01	0.013**
	Residuals	8	0.006
Degrees of freedom (df), mean squares (MS), F-ratio (F), P-value (P).
