# Supplementary material for: Climate change could drive marine food web collapse through altered trophic flows and cyanobacterial proliferation
Source: PLoS Biol. 2018 Jan 9;16(1):e2003446. doi: 10.1371/journal.pbio.2003446 (PMC5760012; doi:10.1371/journal.pbio.2003446)
Supplement: S3 Table — Significant differences are indicated with asterisks, with *: p < 0.05, **: p < 0.01, and ***: p < 0.001. OA, elevated CO2; T, elevated temperature. (XLSX) [file pbio.2003446.s012.xlsx]

## Sheet: Table legend
S3_Table. Analysis of variance of the effects of ocean acidification (OA) and warming (T) and their interaction on cyanobacteria (% cover), flow (%) to detritus, and Finn’s cycling index in the food web. Significant differences are indicated with asterisks, with *: p < 0.05, **: p < 0.01 and ***: p < 0.001.

## Sheet: Table
Response variable	Source of variation	df	MS	F	P
a) Cyanobacteria (% cover)	OA	1	216.1	0.89	0.372
	T	1	4815.2	19.89	0.002**
	OA × T	1	1158.4	4.79	0.06
	Residuals	8	242
b) Flow to detritus (%)	OA	1	4.5	0.01	0.912
	T	1	3164.9	9.12	0.017*
	OA × T	1	981.7	2.83	0.131
	Residuals	8	347.1
c) Finn’s cycling index	OA	1	0.14	0.1	0.758
	T	1	12.98	9.31	0.016*
	OA × T	1	1.83	1.31	0.285
	Residuals	8	1.39
Degrees of freedom (df), mean squares (MS), F-ratio (F), P-value (P).
