# Supplementary material for: Climate change could drive marine food web collapse through altered trophic flows and cyanobacterial proliferation
Source: PLoS Biol. 2018 Jan 9;16(1):e2003446. doi: 10.1371/journal.pbio.2003446 (PMC5760012; doi:10.1371/journal.pbio.2003446)
Supplement: S4 Table — Functional groups were ordered in terms of their contribution to total energy flows. Significant differences indicated with asterisks, with *: p < 0.05, **: p < 0.01, and ***: p < 0.001. OA, elevated CO2; T, elevated temperature. (XLSX) [file pbio.2003446.s013.xlsx]

## Sheet: Table legend
S4_Table. Analysis of variance of the effects of ocean acidification (OA) and warming (T) and their interaction on the absolute flows of contributing functional groups from trophic level 1 to 2. Functional groups were ordered in terms of their contribution to total energy flows. Significant differences indicated with asterisks, with *: p < 0.05, **: p < 0.01 and ***: p < 0.001.

## Sheet: Table
Response variable (transformation)	Source of variation	df	MS	F	P
a) Herbivorous macroinvertebrates (log10)	OA	1	0.6	2.85	0.13
	T	1	0.85	4	0.081
	OA × T	1	1.14	5.39	0.049*
	Residuals	8	0.21
b) Meiobenthos	OA	1	44.37	0.5	0.5
	T	1	1096.82	12.3	0.008**
	OA × T	1	279.13	3.13	0.115
	Residuals	8	89.2
c) Copepods	OA	1	430.6	1.31	0.285
	T	1	4687.5	14.26	0.005**
	OA × T	1	1214.4	3.7	0.09
	Residuals	8	328.6
d) Small epifaunal invertebrates	OA	1	426.94	3.29	0.107
	T	1	740.92	5.7	0.044*
	OA × T	1	287.7	2.21	0.175
	Residuals	8	129.97
e) Herbivorous fishes	OA	1	20.619	0.95	0.358
	T	1	11.213	0.52	0.493
	OA × T	1	2.604	0.12	0.738
	Residuals	8	21.755
f) Filter feeders	OA	1	0.1	0.02	0.903
	T	1	142.5	22.1	0.001**
	OA × T	1	2.21	0.34	0.574
	Residuals	8	6.44
g) Tanaids (log10)	OA	1	1.2	4.41	0.069
	T	1	1.21	4.47	0.068
	OA × T	1	0.11	0.42	0.534
	Residuals	8	0.27
h) Macro-crustaceans	OA	1	1.16	0.42	0.537
	T	1	0.86	0.31	0.594
	OA × T	1	1.88	0.67	0.435
	Residuals	8	2.79
i) Microzooplankton	OA	1	0.21	1.88	0.207
	T	1	0.47	4.08	0.078
	OA × T	1	0.01	0.05	0.823
	Residuals	8	0.12
j) Carnivorous fishes (benthic)	OA	1	0.05	8.47	0.020*
	T	1	0.1	17.58	0.003**
	OA × T	1	0.05	7.93	0.023*
	Residuals	8	0.01
k) Omnivorous fishes	OA	1	0.01	3.84	0.085
	T	1	0.02	7.98	0.022*
	OA × T	1	<0.00	0.05	0.817
	Residuals	8	<0.00
l) Carnivorous fishes (log10)	OA	1	0.01	618.02	<0.001***
	T	1	0.03	1306.41	<0.001***
	OA × T	1	0.02	902.34	<0.001***
	Residuals	8	0
