# Supplementary material for: Climate change could drive marine food web collapse through altered trophic flows and cyanobacterial proliferation
Source: PLoS Biol. 2018 Jan 9;16(1):e2003446. doi: 10.1371/journal.pbio.2003446 (PMC5760012; doi:10.1371/journal.pbio.2003446)
Supplement: S9 Table — TL: trophic level, B: biomass (gWWm−2), P/B: production/biomass ratio (per 4 months), Q/B: consumption/biomass ratio (per 4 months), EE: ecotrophic efficiency, P/Q: gross food conversion efficiency of each functional group. OAM1 represents acidification model 1, OAM2 represents acidification model 2, and OAM3 represents acidification model 3. The value in bold indicates that particular parameter varies among the models as mentioned below the table. OA, elevated CO2. (XLSX) [file pbio.2003446.s018.xlsx]

## Sheet: Table legend
S9_Table. Input (non-italic) and output (italic) parameters for the ecosystem components used in the acidification (OA) models. TL: trophic level, B: biomass (g WWm-2), P/B: production/biomass ratio (per 4 months), Q/B: consumption/biomass ratio (per 4 months), EE: ecotrophic efficiency, P/Q: gross food conversion efficiency of each functional group. OAM1 represents acidification model 1, OAM2 re…

## Sheet: Table
	Functional groups	All models		OAM1	OAM2	OAM3		All models			OAM1	OAM2	OAM3		All models
		TL		B				P/B	Q/B		EE				P/Q
1	Carnivorous fishes	3		0.12	0.11	0.14		0.97	35.66		0	0	0		0.03
2	Omnivorous fishes	2.96		0.39	0.26	0.16		1.1	47.15		0	0	0		0.02
3	Herbivorous fishes	2.08		1.16	0.81	0.56		0.88	57.49		0	0	0		0.02
4	Carnivorous fishes (benthic)	2.9*		0.69	0.56	0.65		0	20.6		0	0	0		0
5	Herbivorous macroinvertebrates	2		29.34	25.82	27.28		0.3	9.97		0	0	0		0.03
6	Small epifaunal invertebrates	2.07		9.61	12.74	7.24		6.84	19.87		0.11	0.06	0.08		0.34
7	Filter feeders	2.45		12.78	7.02	8.64		2.05	7.6		0.36	0.8	0.41		0.27
8	Macro-crustaceans	2.1		1	2.69	2.3		0.78	10.72		0	0	0		0.07
9	Tanaids	2.05		1.12	0.9	2.13		18.07	58.4		0.37	0.36	0.16		0.31
10	Copepods	2		0.89	0.78	0.46		143.81	462.43		0.49	0.34	0.63		0.31
11	Microzooplankton	2		0.29	0.26	0.28		23.11	63.49		0.8	0.92	0.78		0.36
12	Meiobenthos	2		4.83	4.03	4.51		10.06	58.4		0.09	0.09	0.16		0.17
13	Macrophytes	1		47.52	49.1	45.11		2.22	0		0.53	0.86	0.38
14	Mat forming algae	1		49.41	18.32	24.34		30.85	0		0.44	0.99	0.69
15	Phytobenthos	1		2.75	1.61	1.46		39.21	0		0.62	0.91	0.95
16	Phytoplankton	1		1.01	0.88	0.86		319.85	0		0.71	0.86	0.51
17	Detritus	1		2.84	2.94	2.42					0.23	0.53	0.42
	* Trophic level of carnivorous fishes (benthic) within the acidification model 2 was 2.80
