# Supplementary material for: Climate change could drive marine food web collapse through altered trophic flows and cyanobacterial proliferation
Source: PLoS Biol. 2018 Jan 9;16(1):e2003446. doi: 10.1371/journal.pbio.2003446 (PMC5760012; doi:10.1371/journal.pbio.2003446)
Supplement: S13 Table — The fraction of one compartment consumed by another is expressed as the fraction of the total diet, the sum of each column being equal to 1. Values with mean ± SD represent the adjustment of different prey groups in predator diets across models. OA, elevated CO2. (XLSX) [file pbio.2003446.s022.xlsx]

## Sheet: Table legend
S13_Table. Predator/prey matrix (column/raw) for acidification (OA) models. The fraction of one compartment consumed by another is expressed as the fraction of the total diet, the sum of each column being equal to one. Values with mean ± SD represent the adjustment of different prey groups in predator diets across models.

## Sheet: Table
	Functional groups	1	2	3	4	5	6	7	8	9	10	11	12
1	Carnivorous fishes
2	Omnivorous fishes
3	Herbivorous fishes
4	Carnivorous fishes (benthic)
5	Herbivorous macroinvertebrates
6	Small epifaunal cryptic invertebrates		0.11	0.05	0.11
7	Filter feeders						0.05
8	Macro-crustaceans
9	Tanaids	0.02	0.04	0.01	0.41
10	Copepods		0.81	0.01	0.34			0.4	0.1
11	Microzooplankton	0.75						0.05
12	Meiobenthos	0.24			0					0.05
13	Macrophytes		0.05	0.24	0.08		0.2
14	Mat-forming algae			0.68		1	0.7		0.4	0.05	0.45
15	Phytobenthos									0.4	0.1
16	Phytoplankton							0.5			0.4	1
17	Detritus				0.06		0.05	0.05	0.5	0.5	0.05		1
		1	1	1	1	1	1		1	1	1	1	1
	Copepods							0.42±0.02
	Microzooplankton							0.03±0.02
	Macrophytes						0.25±0.09
	Mat-forming algae						0.68±0.03			0.08±0.04	0.40±0.09
	Phytobenthos									0.37±0.04	0.09±0.00
	Phytoplankton										0.46±0.08
